# Supplementary material for: A Label-Free Fluorescent Aptasensor for Detection of Staphylococcal Enterotoxin A Based on Aptamer-Functionalized Silver Nanoclusters
Source: PubMed Central journal article supplement (PMC7023026; doi:10.3390/polym12010152), 2020-01-07
Supplement: polymers-12-00152-s001.pdf [file polymers-12-00152-s001.pdf]

**Table S1.** Oligonucleotides names, abbreviations and DNA sequences

| Name           | Abbreviations | Sequences (5' → 3')                                                                                                             |
|----------------|---------------|---------------------------------------------------------------------------------------------------------------------------------|
| C17            | C17           | CCCCCCCCCCCCCCCCCC                                                                                                              |
| C6G5C6         | C6G5C6        | CCCCCGGGGGCCCCC                                                                                                                 |
| SEA aptamer    | Apt           | <u>AGCAGCACAGAGGTCAGATGTACTTATGCATTTCTCCC</u><br><u>ACGATCTTATTTGAGAGTGACCCTATGCGTGCTACCGTG</u><br><u>AA</u>                    |
| C17-aptamer    | C17-apt       | CCCCCCCCCCCCCCCCCC <u>AGCAGCACAGAGGTCAGATGT</u><br><u>ACTTATGCATTTCTCCCACGATCTTATTTGAGAGTGACC</u><br><u>CTATGCGTGCTACCGTGAA</u> |
| C6G5C6-aptamer | C6G5C6-apt    | CCCCCGGGGGCCCCC <u>AGCAGCACAGAGGTCAGATGT</u><br><u>ACTTATGCATTTCTCCCACGATCTTATTTGAGAGTGACC</u><br><u>CTATGCGTGCTACCGTGAA</u>    |

**Table S2.** Comparison of the performance of the developed bioassay detected SEA with other methods.

| Method Strategy                                                     | Detection | LOD (ng ml <sup>-1</sup> ) | Linear range         | Ref.         |
|---------------------------------------------------------------------|-----------|----------------------------|----------------------|--------------|
| quartz crystal microbalance                                         | antibody  | 1 ng /mL                   | 50-1000 ng/mL        | [1]          |
| electrochemical immunosensor                                        | antibody  | 33.9 ng/mL                 | 0.016-0.150 mg/mL    | [2]          |
| DAS-ELISA                                                           | antibody  | 32 pg/mL                   | 4-1000 pg/mL         | [3]          |
| chemiluminescence enzyme immunoassay                                | antibody  | 3.2 pg/mL                  | 6.4 pg/mL-1600 pg/mL | [4]          |
| surface plasmon resonance                                           | antibody  | 100 ng / mL                | 100-1000 ng/mL       | [5]          |
| LC-ESI / MS                                                         |           | 0.5 ng/mL                  | 1-100 ng/mL          | [6]          |
| capillary electrophoresis with laser-induced fluorescence detection | antibody  | 3 aM                       | 0.3 nM and 6.5 nM    | [7]          |
| evanescent wave biosensor                                           | antibody  | 10 ng/mL                   | 10–100 ng/mL         | [8]          |
| DNA-AgNCs-PPYNPs                                                    | aptamer   | 0.3393 ng/mL               | 0.5 to 1000 ng/mL    | Present work |

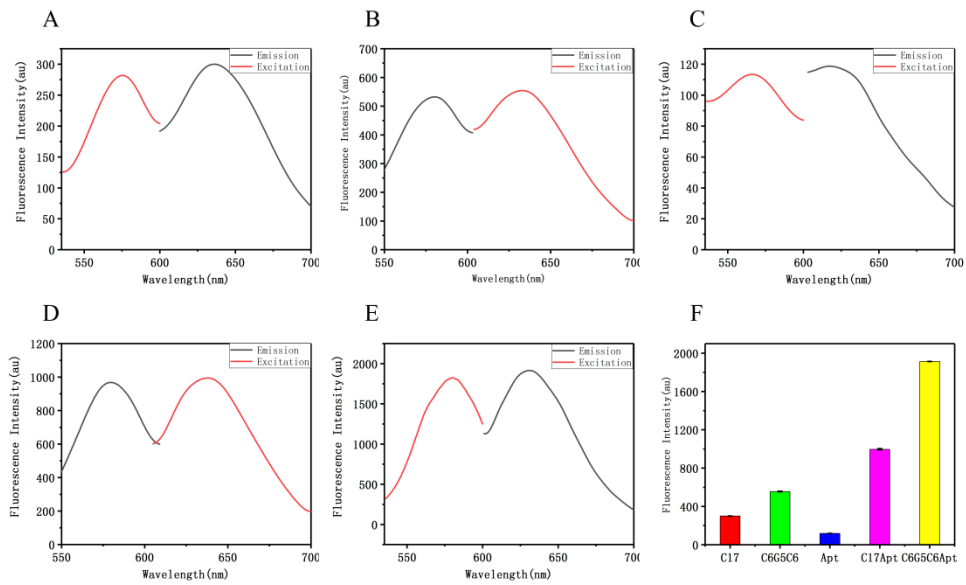

**Figure S1.** AgNCs synthesized with different nucleotides sequences (Table S1) as the template.

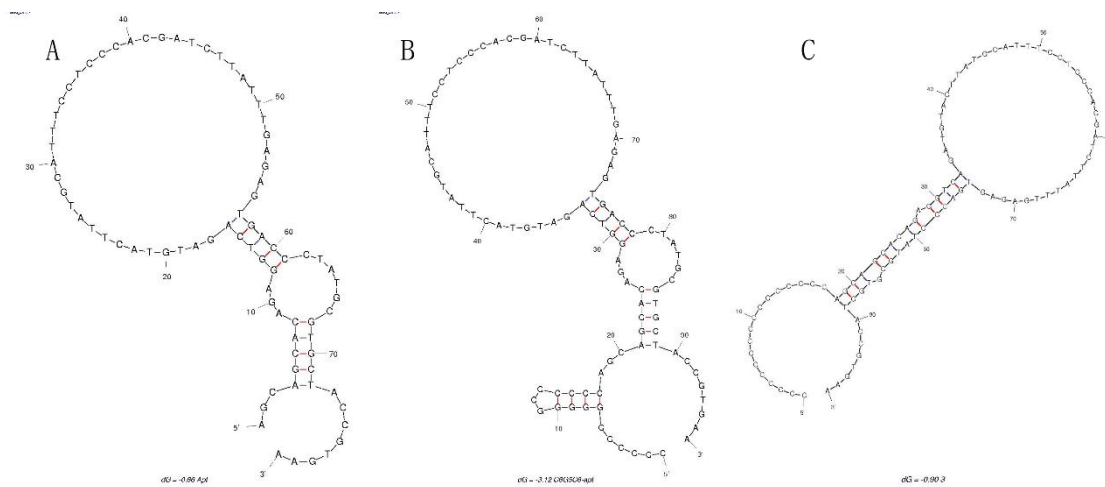

**Figure S2.** The secondary structure of Apt(A), C6G5C6-apt(B) and C17-apt(C)

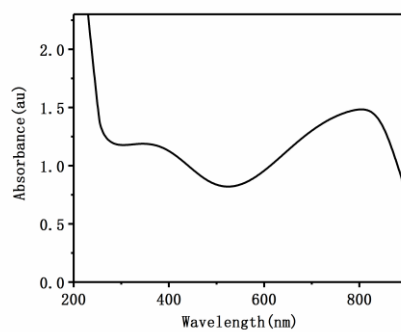

**Figure S3.** UV-vis absorption spectrum of the PPyNPs

1. Ben Haddada, M.; Salmain, M.; Boujday, S. Gold colloid-nanostructured surfaces for enhanced piezoelectric immunosensing of staphylococcal enterotoxin A. *Sensors and Actuators B: Chemical* **2018**, *255*, 1604–1613, doi:<https://doi.org/10.1016/j.snb.2017.08.180>.
2. Pimenta-Martins, M.G.R.; Furtado, R.F.; Heneine, L.G.D.; Dias, R.S.; Borges, M.d.F.; Alves, C.R. Development of an amperometric immunosensor for detection of staphylococcal enterotoxin type A in cheese. *Journal of Microbiological Methods* **2012**, *91*, 138–143, doi:<https://doi.org/10.1016/j.mimet.2012.05.016>.
3. Clarisse, T.; Michèle, S.; Olivier, T.; Valérie, E.; Vincent, L.M.; Jacques-Antoine, H.; Michel, G.; Florence, V. Detection and quantification of staphylococcal enterotoxin A in foods with specific and sensitive polyclonal antibodies. *Food Control* **2013**, *32*, 255–261, doi:<https://doi.org/10.1016/j.foodcont.2012.11.021>.
4. Zhang, C.; Liu, Z.; Li, Y.; Li, Q.; Song, C.; Xu, Z.; Zhang, Y.; Zhang, Y.; Ma, Y.; Sun, Y., et al. High sensitivity chemiluminescence enzyme immunoassay for detecting staphylococcal enterotoxin A in multi-matrices. *Analytica Chimica Acta* **2013**, *796*, 14–19, doi:<https://doi.org/10.1016/j.aca.2013.07.044>.
5. Tsai, W.-C.; Li, I.-C. SPR-based immunosensor for determining staphylococcal enterotoxin A. *Sensors and Actuators B: Chemical* **2009**, *136*, 8–12, doi:<https://doi.org/10.1016/j.snb.2008.10.061>.
6. Andjelkovic, M.; Tsilia, V.; Rajkovic, A.; De Cremer, K.; Van Loco, J. Application of LC-MS/MS MRM to Determine Staphylococcal Enterotoxins (SEB and SEA) in Milk. *Toxins* **2016**, *8*, doi:10.3390/toxins8040118.
7. Lam, M.T.; Wan, Q.H.; Boulet, C.A.; Le, X.C. Competitive immunoassay for staphylococcal enterotoxin A using capillary electrophoresis with laser-induced fluorescence detection. *Journal of Chromatography A* **1999**, *853*, 545–553, doi:[https://doi.org/10.1016/S0021-9673\(99\)00677-9](https://doi.org/10.1016/S0021-9673(99)00677-9).
8. Rasooly, L.; Rasooly, A. Real time biosensor analysis of Staphylococcal enterotoxin A in food. *International Journal of Food Microbiology* **1999**, *49*, 119–127, doi:[https://doi.org/10.1016/S0168-1605\(99\)00053-7](https://doi.org/10.1016/S0168-1605(99)00053-7).
